# Supplementary material for: Imidazole derivative-functionalized carbon dots: using as a fluorescent probe for detecting water and imaging of live cells
Source: Royal Society of Chemistry journal article supplement (doi:10.1039/c5dt00128e), 2015-01-01
Supplement: c5dt00128e1.pdf [file c5dt00128e1.pdf]

**Supplementary Material**

**Imidazole derivative-functionalized carbon dots: Using as a fluorescent probe for detecting water and imaging of live cells**

*Xudong Wang<sup>a</sup>, Dan Wang<sup>a</sup>, Yali Guo<sup>a</sup>, Chengduan Yang<sup>a</sup>, Anam Iqbal<sup>a</sup>, Weisheng Liu<sup>a</sup>, Wenwu Qin<sup>a\*</sup>, Dan Yan<sup>b</sup>, Huichen Guo<sup>b\*\*</sup>*

[Jan 12, 2015]

*<sup>a</sup>Key Laboratory of Nonferrous Metal Chemistry and Resources Utilization of Gansu Province and State Key Laboratory of Applied Organic Chemistry, College of Chemistry and Chemical Engineering, Lanzhou University, Lanzhou 730000, P. R. China.*

*<sup>b</sup>State Key Laboratory of Veterinary Etiological Biology and Key Laboratory of Animal Virology of Ministry of Agriculture, Lanzhou Veterinary Research Institute, Chinese Academy of Agricultural Sciences, Xujiaping 1, Lanzhou, Gansu, 730046, The People's Republic of China*

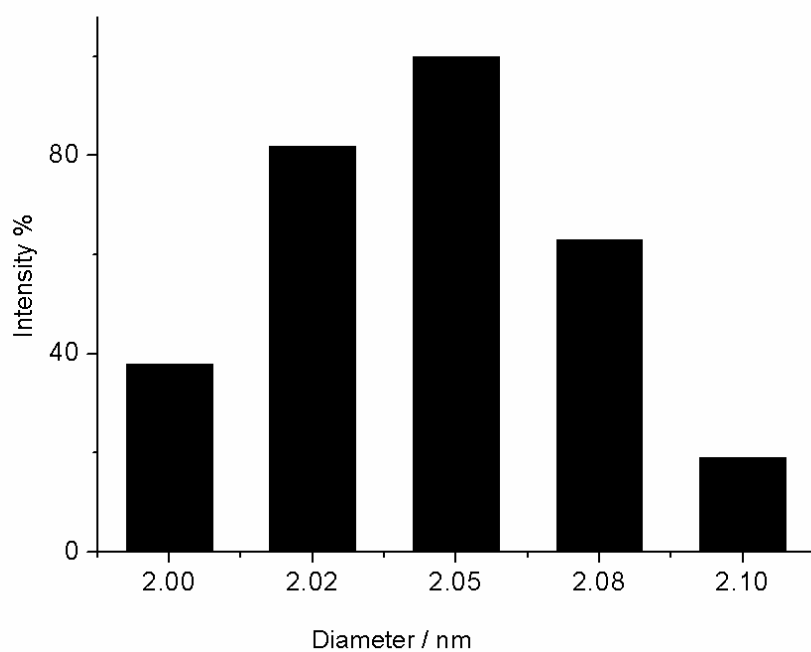

**Fig. S1** DLS of CDs.

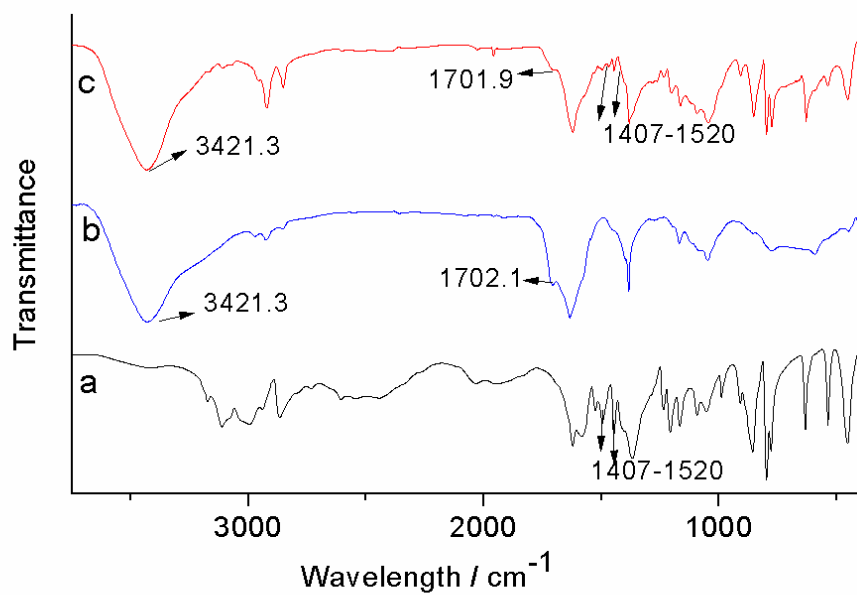

**Fig. S2** FTIR spectra of 1H-Imidazole-4-carboxylic acid (a), CDs (b) and CDs-imidazole (c)

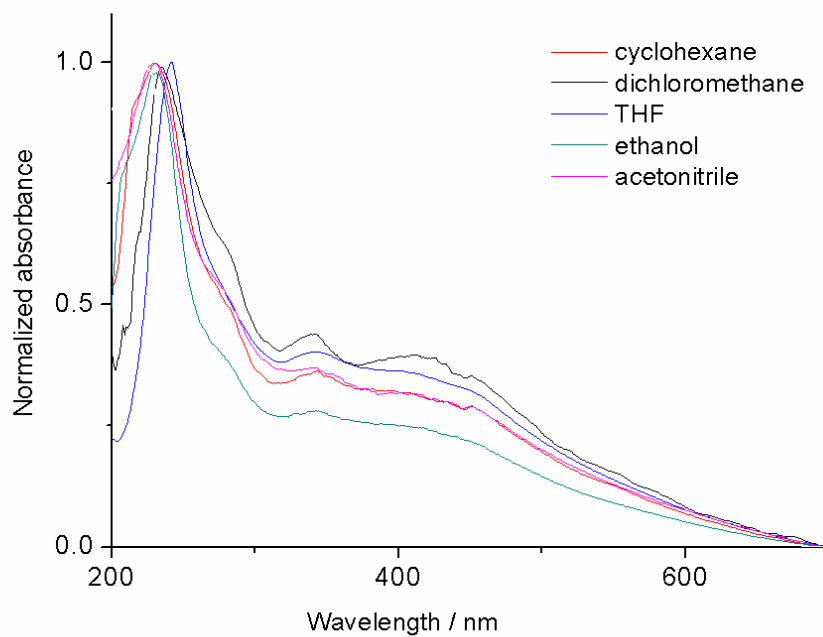

**Fig. S3** Normalized UV-Vis spectra of the CDs-imidazole in different solvents.

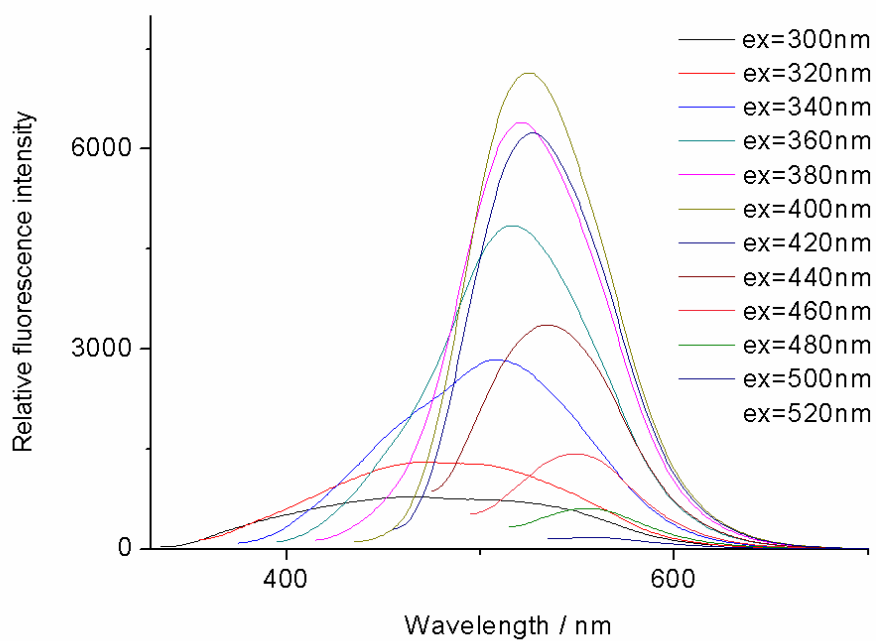

**Fig. S4** Fluorescence spectra of CDs in water under different excitation wavelength.

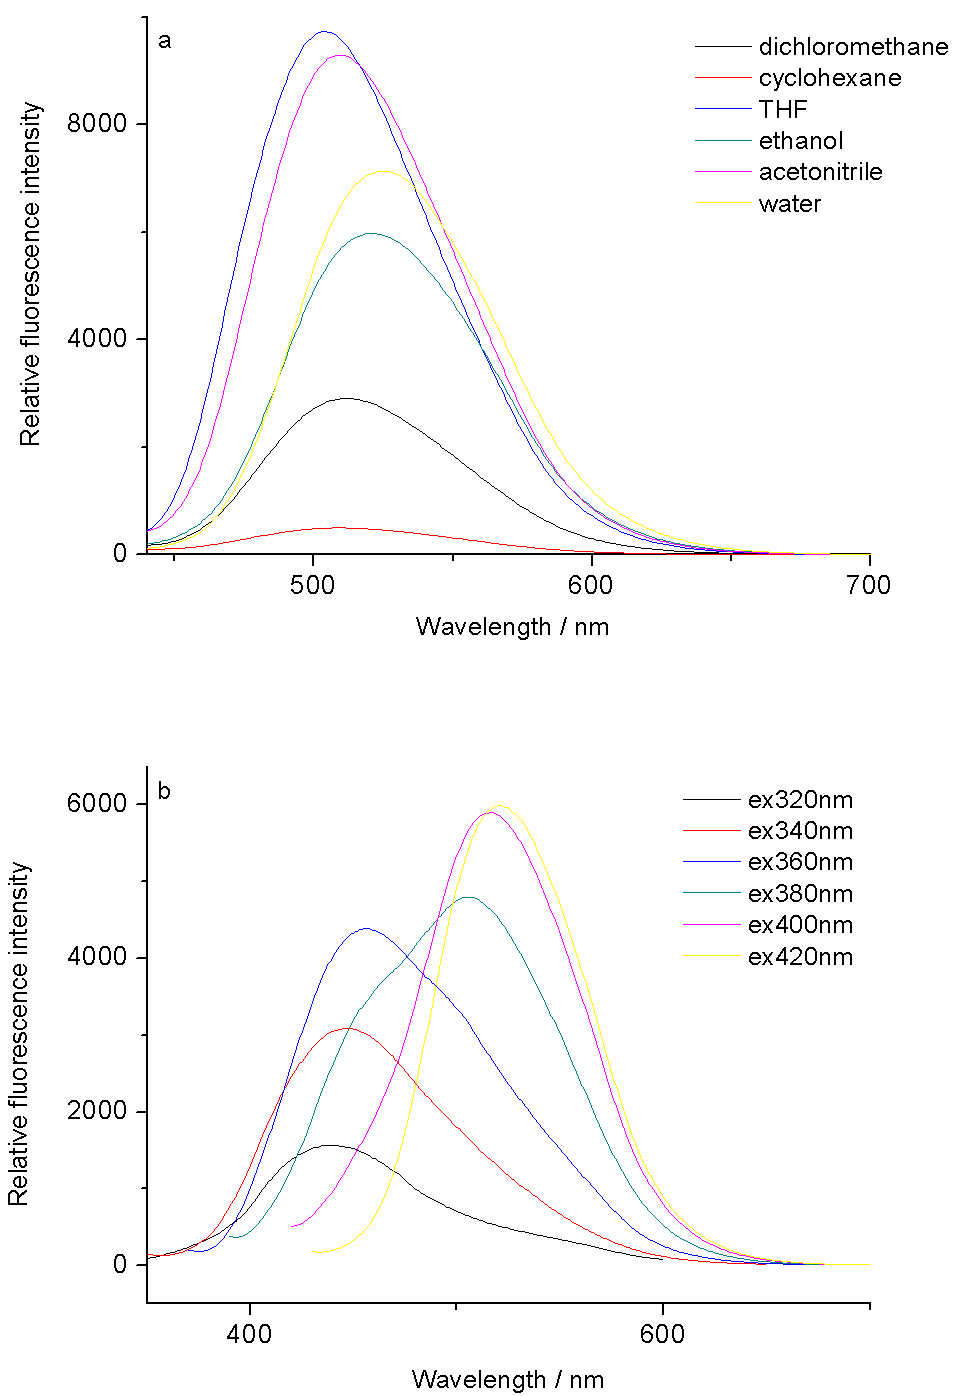

**Fig. S5 (a)** Fluorescence emission spectra ( $\lambda_{\text{ex}}=420$  nm) of the CDs in different solvents and water. **(b)** Fluorescence emission spectra of the CDs in ethanol when excited at different wavelength.

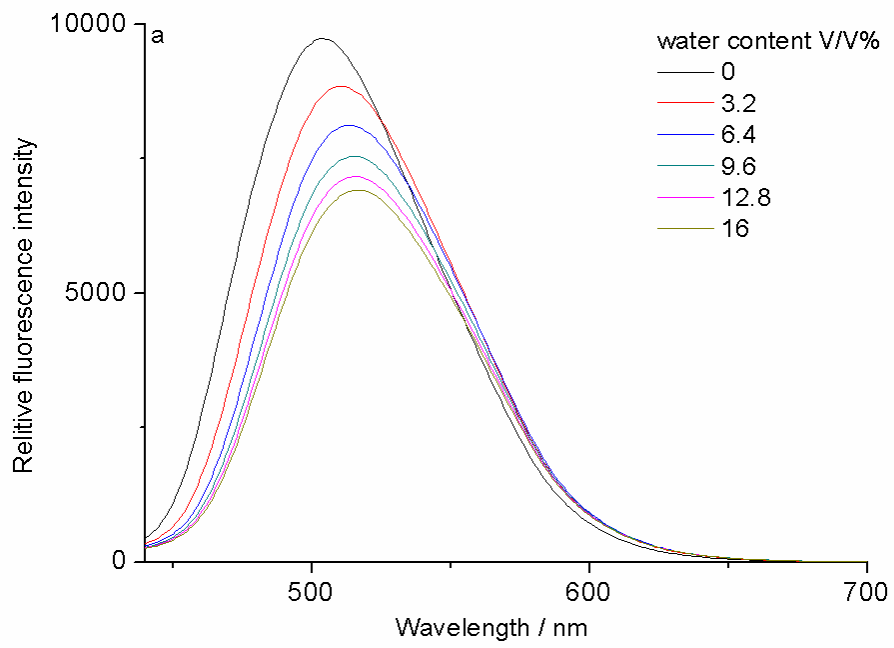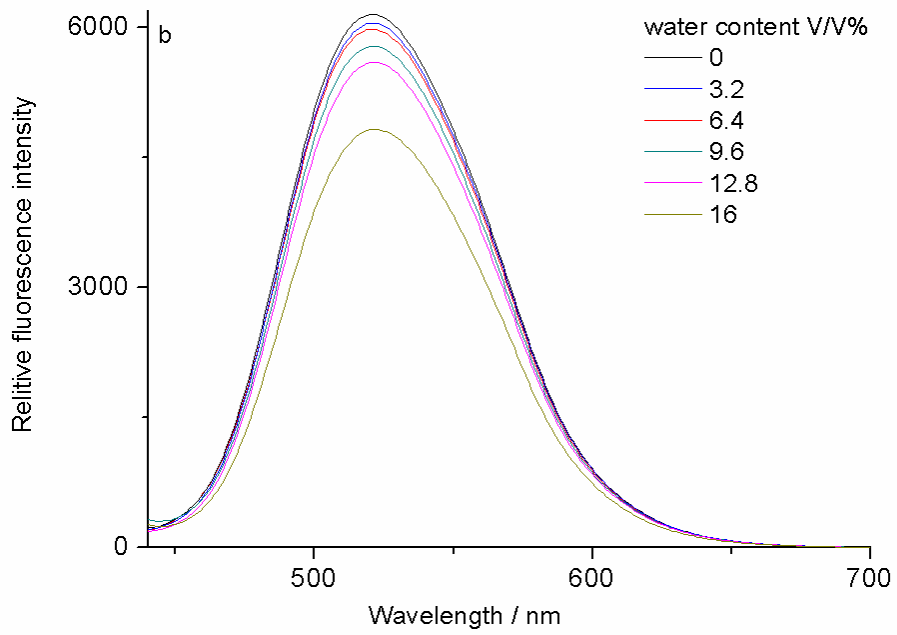

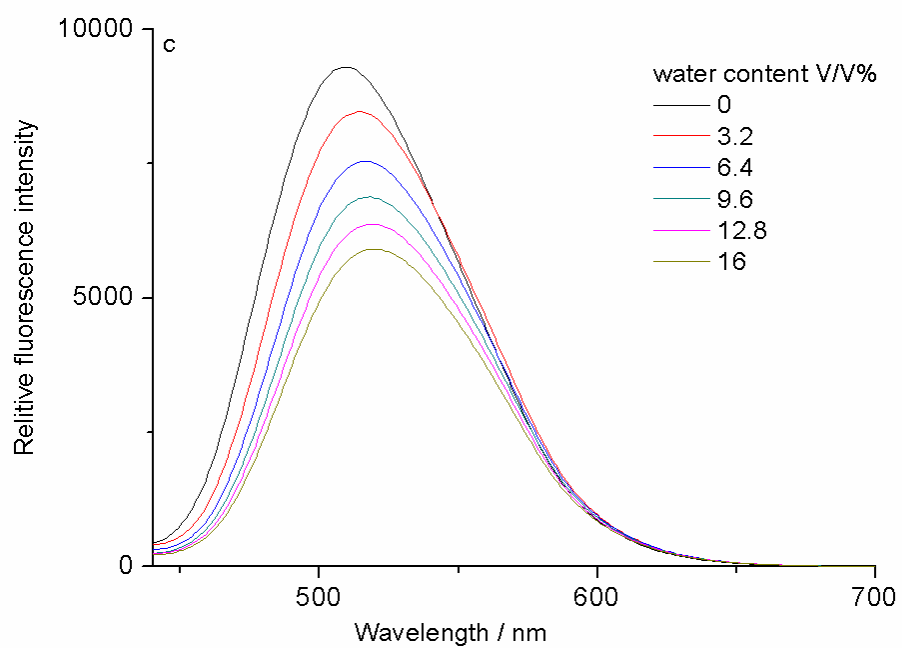

Fig. S6 Fluorescence emission spectra ( $\lambda_{\text{ex}}=420$  nm) of CDs in THF (a), ethanol (b), acetonitrile (c) with increasing water content.

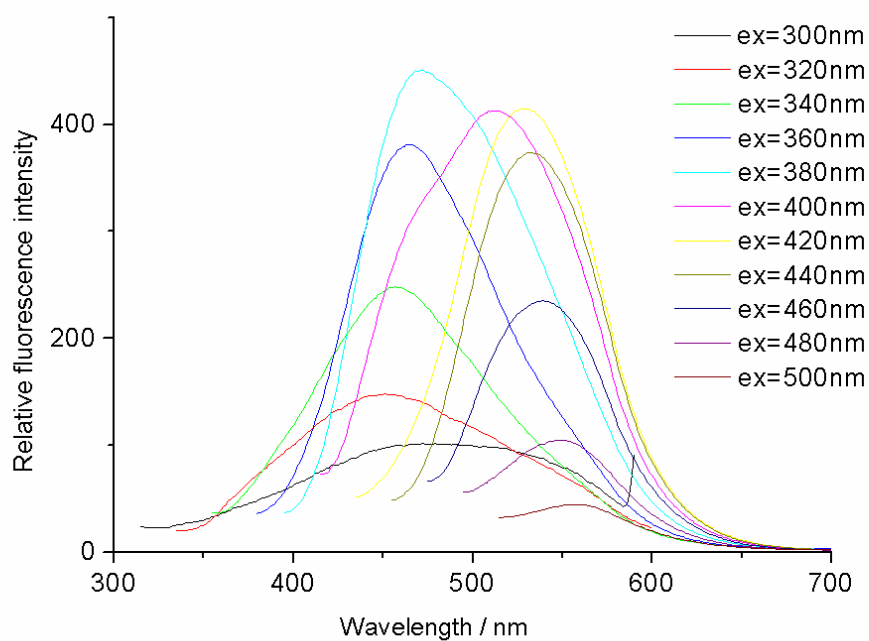

**Fig. S7** Fluorescence spectra of CDs-imidazole in water under different excitation wavelength.



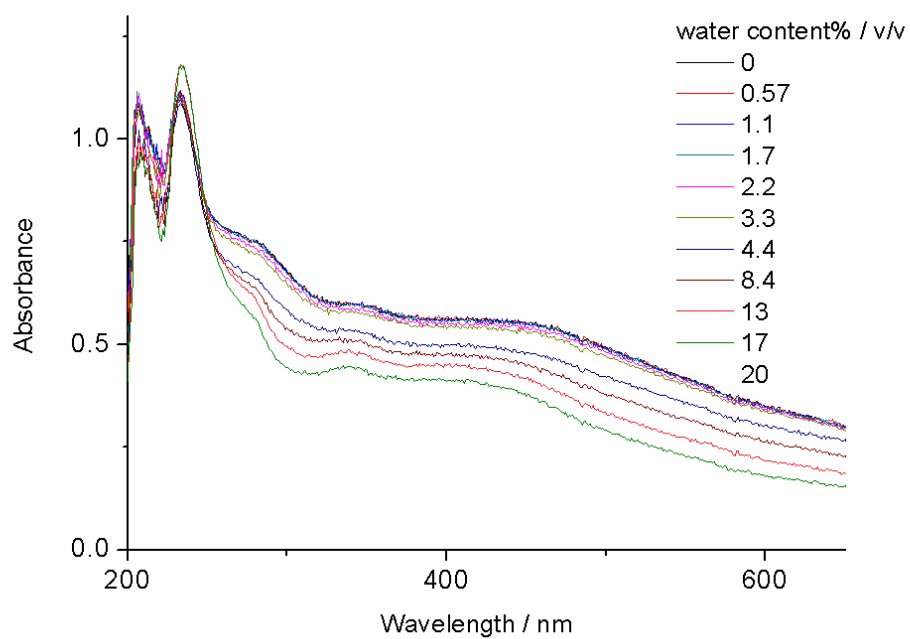

**Fig. S8** UV-Vis spectra of CDs-imidazole in ethanol with increasing water content (v/v).

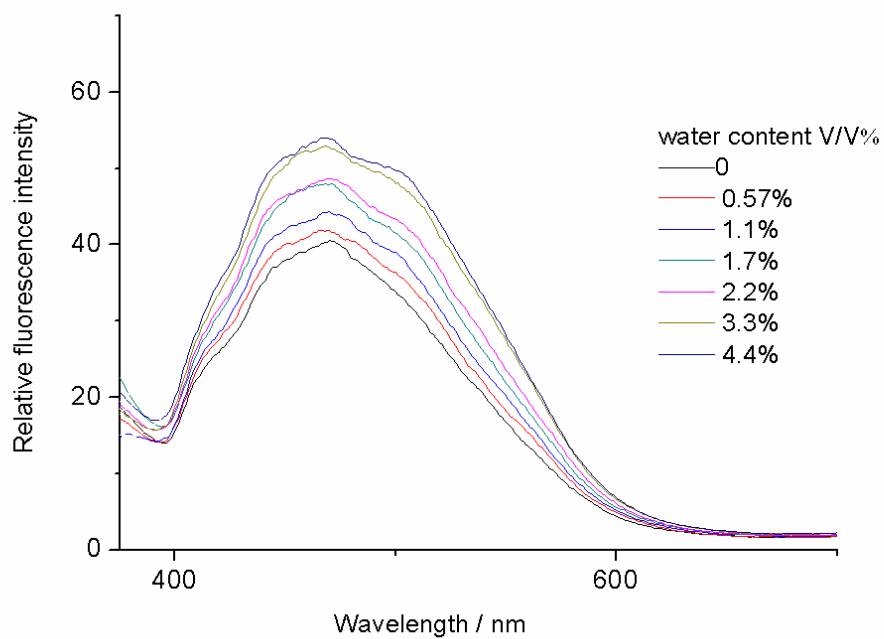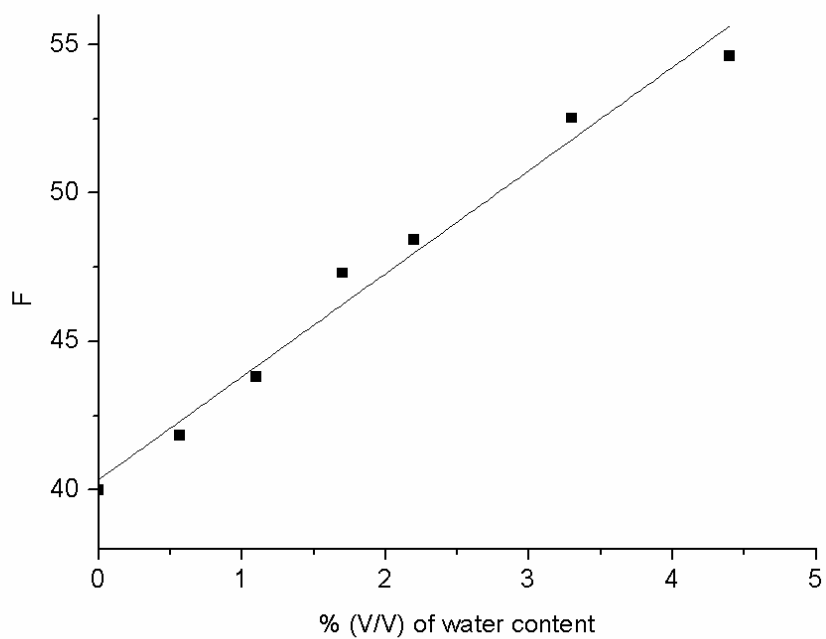

**Fig. S9.** Fluorescence emission spectra ( $\lambda_{\text{ex}}=360$  nm) of CDs-imidazole in ethanol with increasing water content (0-5 %, v/v) (a); and calibration curves as a function of water content (0-5 %, v/v) in ethanol (b).

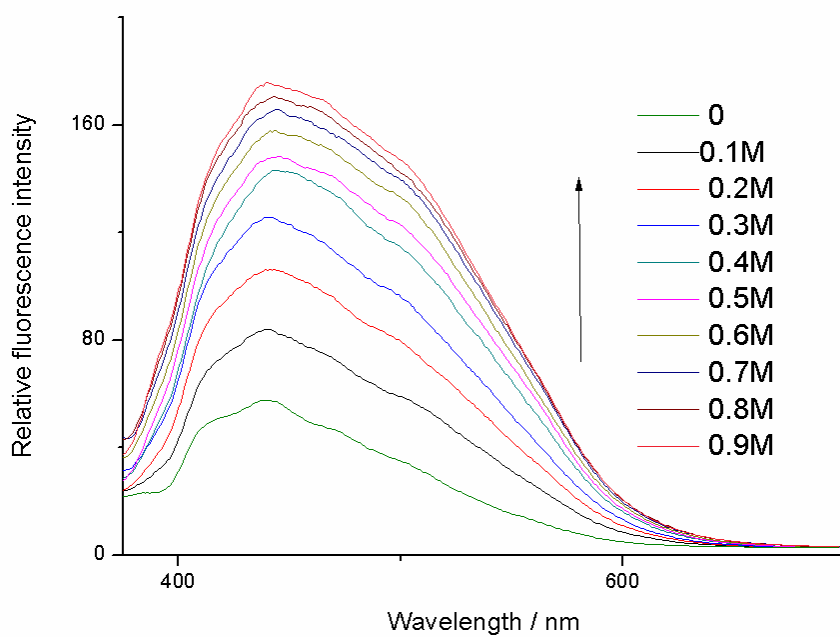

**Fig. S10** Fluorescence emission spectra ( $\lambda_{\text{ex}}=360$  nm) of CDs-imidazole upon addition of *pTsOH* in ethanol.

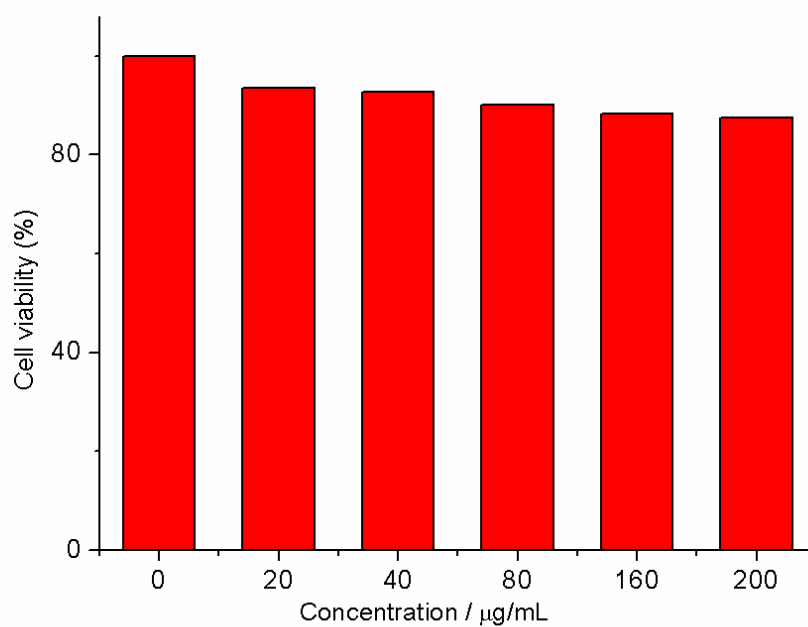

**Fig. S11.** Effects of CDs-imidazole at varied concentrations on the viability of BHK cells

To investigate the fluorescence dynamics of CDs and CDs-imidazole, fluorescence decay traces of CDs and CDs-imidazole in solvents were collected as a function of emission wavelength  $\lambda_{em}$  by the single-photon timing technique. Each fluorescence decay trace, was analyzed individually as a sum of three exponential function in terms of decay times  $\tau_i$  and associated preexponential factors  $\alpha_i$  ( $i = 1-3$ ). Mono- or bi-exponential decay functions fail to describe the observed decay as evidenced by the large  $\chi^2$  and high non-random residuals. Table S2 summarizes the time resolved fluorescence data of CDs and CDs-imidazole in different solvents.

Before an attempt is made to analyze the results, it is worth recapitulating the literature data on CDs. For CDs in ethanol, a tri-exponential function ( $\sim 1.0$  ns,  $\sim 5.0$  ns and  $\sim 13.0$  ns) was used to fit the decay at all three emission wavelengths.<sup>1</sup> The fluorescence decay of CDs in the present work at  $\lambda_{ex}=360$  nm also displays tri-exponential behavior in water and ethanol. In water, a tri-exponential function ( $\sim 1.2$  ns,  $\sim 5.5$  ns and  $\sim 12.0$  ns) was used to fit the decay at all three emission wavelengths (Fig. S10). The fast component ( $\tau_1 \sim 1.2$  ns) has the amplitude of about  $\sim 3$  %, whereas the contributions of the  $\tau_2$  ( $\sim 5.5$  ns) and  $\tau_3$  ( $\sim 12.0$  ns) components are about  $\sim 30$  % and  $\sim 67$  %, respectively. The decay times are similar to those reported in the literature.<sup>1,2</sup> Change solvent from water to ethanol (Fig. S11) does not induce a clear change in the fluorescence decay, which is still a tri-exponential function ( $\sim 1.2$  ns,  $\sim 6.5$  ns and  $\sim 12.0$  ns) in ethanol. The multiexponential nature of the lifetime suggests that the components of CDs and their analogues in water are complicated, probably due to the involvement of different particle sizes and emissive trap sites.

The fluorescence lifetimes of CDs-imidazole in organic solvents were too short and could not be determined. So fluorescence decay traces of CDs-imidazole in different aqueous–organic (water–ethanol, water–THF and water–MeCN) media (1:1, v/v) were collected as a function of emission wavelength (Fig. S12). A tri-exponential function ( $\sim 1.0$  ns,  $\sim 5.0$  ns and  $\sim 12.0$  ns) was used to fit the decay at all three emission wavelengths for CDs-imidazole in water–ethanol media (1:1, v/v). The decay times are similar to the values of CDs in water ( $\sim 1.2$  ns,  $\sim 5.5$  ns and  $\sim 12.0$  ns). But the decays  $\tau_1$  and  $\tau_2$  become slightly shorter (Fig. S13a).

The decay times of CDs-imidazole in different aqueous–organic solvents are similar to each other. The fluorescence decay was fitted to the tri-exponential profile with the decay times of  $\sim 1.0$  ns,  $\sim 5.0$  ns and  $\sim 12.0$  ns. From fig. 12 one could see that the fluorescence decay traces in different aqueous–organic solvents are almost completely overlapped. In pure water, analogously to the CDs-imidazole in aqueous–organic, tri-exponential function ( $\sim 1.0$  ns,  $\sim 5.0$  ns and  $\sim 12.0$  ns) was used to fit the decay in water.

On the other hand, the fluorescence decays of CDs-imidazole upon addition of 0.9 M *p*TsOH in acidic ethanol conditions was also investigated with three lifetimes  $\sim 0.8$  ns,  $\sim 3.5$  ns and  $\sim 14.0$  ns. The decays  $t_1$  and  $t_2$  become shorter which were compared to that of CDs-imidazole in water–ethanol media (1:1, v/v) ( $\sim 1.0$  ns,  $\sim 5.0$  ns and  $\sim 12.0$  ns) (Fig. S13b). The longest decay time becomes longer but its contribution decreases (from  $\sim 60\%$  decreases to  $\sim 20\%$ ).

The fluorescence quantum yield (FLQY) of CDs in ethanol is 15.9% with the

excitation wavelength at 360 nm. The FLQY of CDs-imidazole in ethanol which contains 50%water is 6.29%. The FLQY of CDs-imidazole in acidic ethanol (0.9 M *p*TsOH) is 3.0%. The FLQY of CDs-imidazole in ethanol is 0.2%. The results of steady-state fluorescent are corresponding to that of the time-resolved fluorescence spectroscopy.

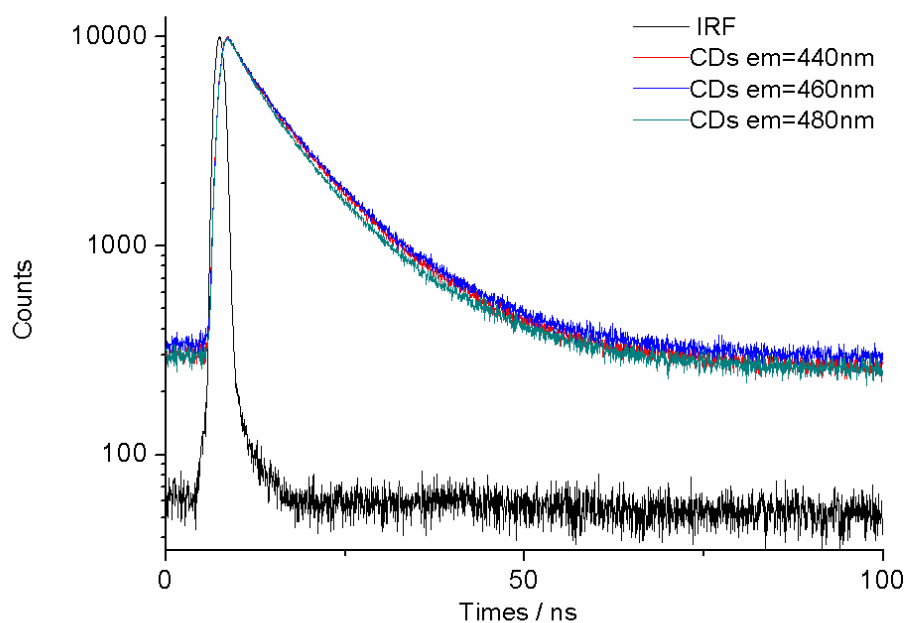

**Fig. S12** The decay curves of CDs in water collected at different wavelengths when excited at 360 nm.

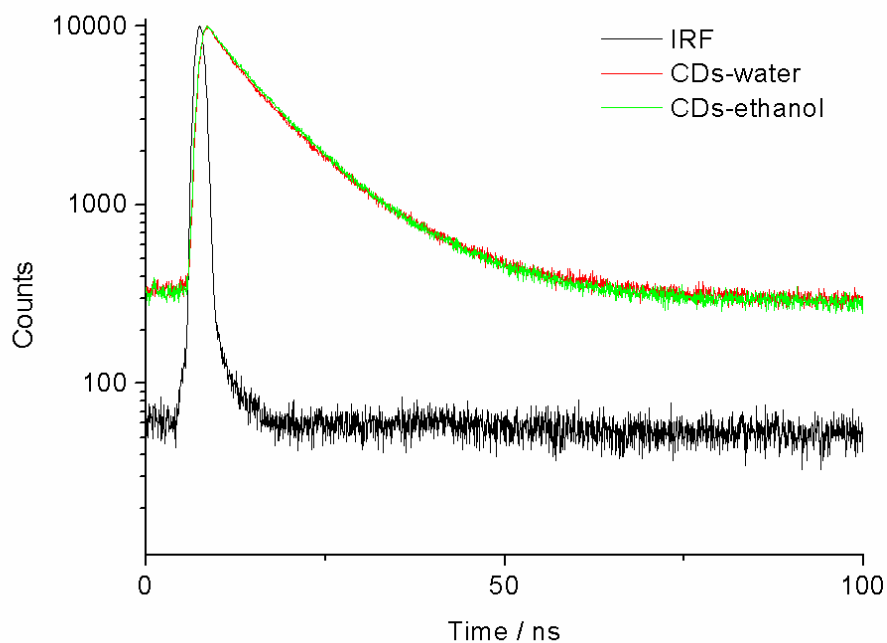

**Fig. S13** The decay curves of CDs in water and ethanol collected at 460 nm when excited at 360 nm.

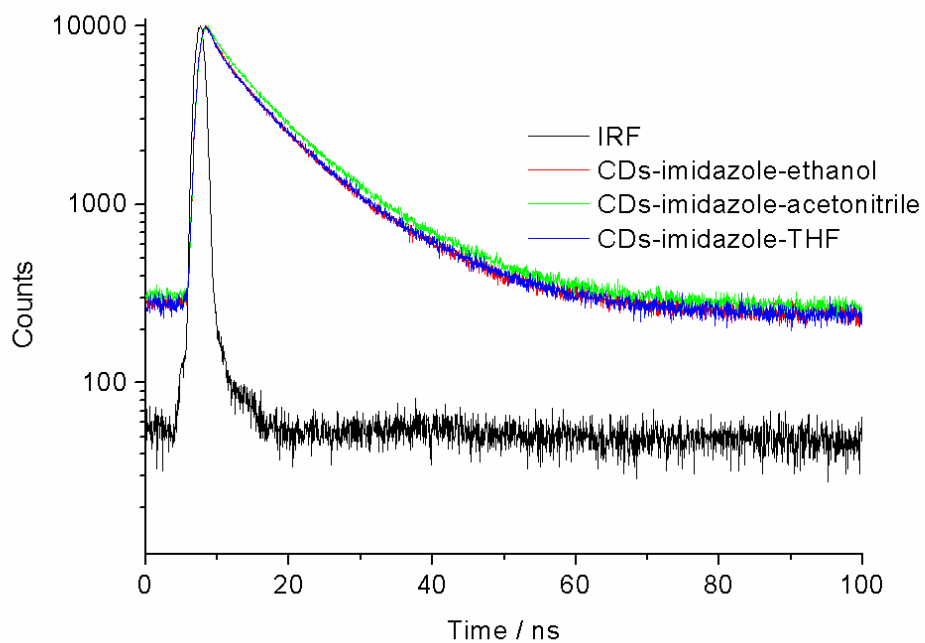

**Fig. S14** Fluorescence lifetime decay of CDs-imidazole in different organic solvents.

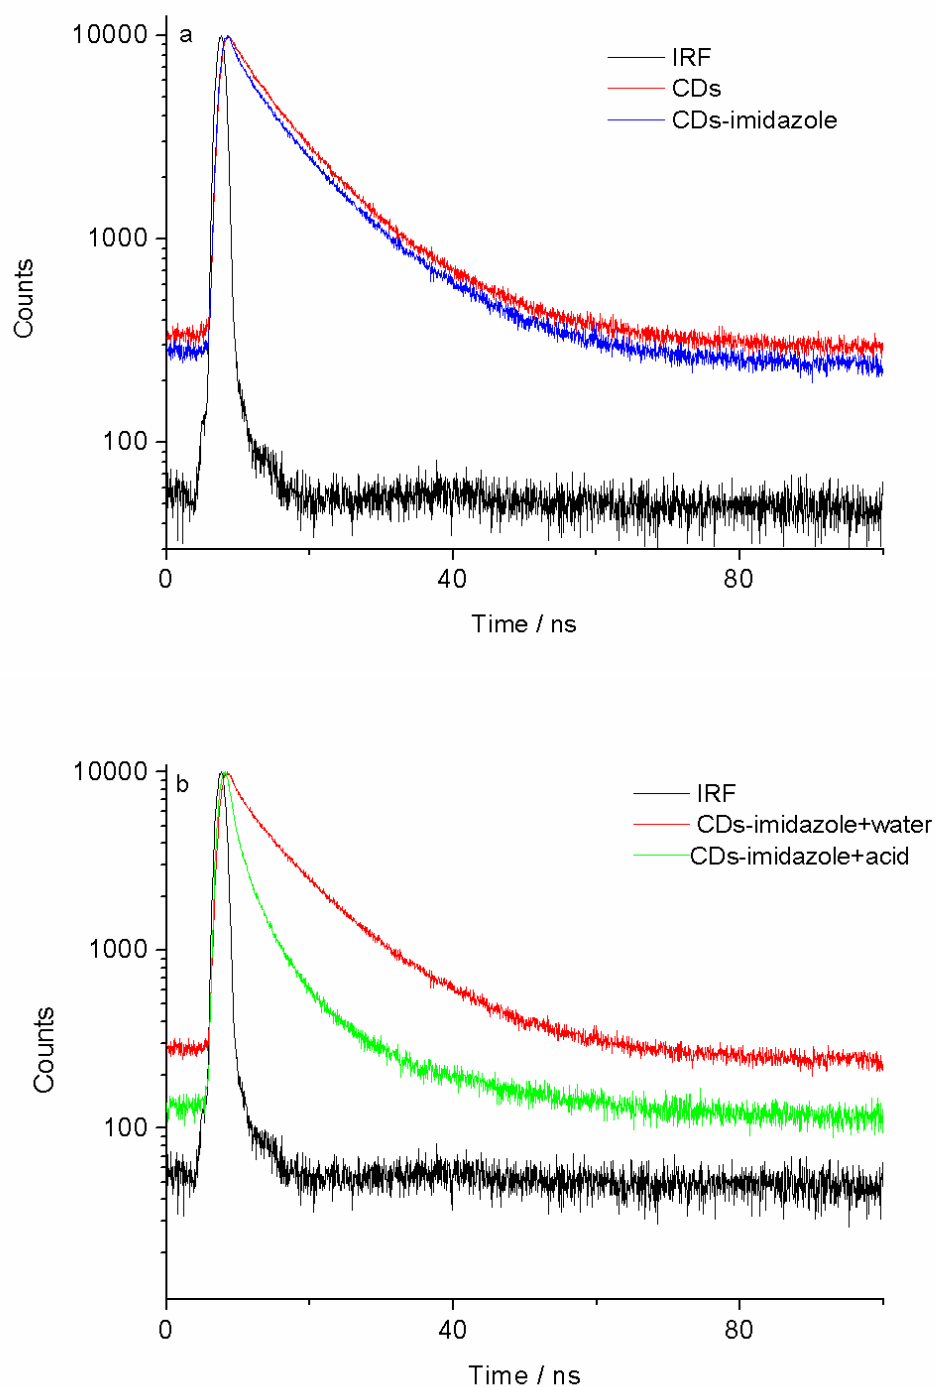

**Fig. S15** Fluorescence lifetime decay of (a) CDs in water and CDs-imidazole in water–ethanol media (1:1, v/v) (b) CDs-imidazole in water–ethanol media (1:1, v/v) and CDs-imidazole upon addition 0.9 M *p*TsOH in ethanol collected at 460 nm when excited at 360 nm.



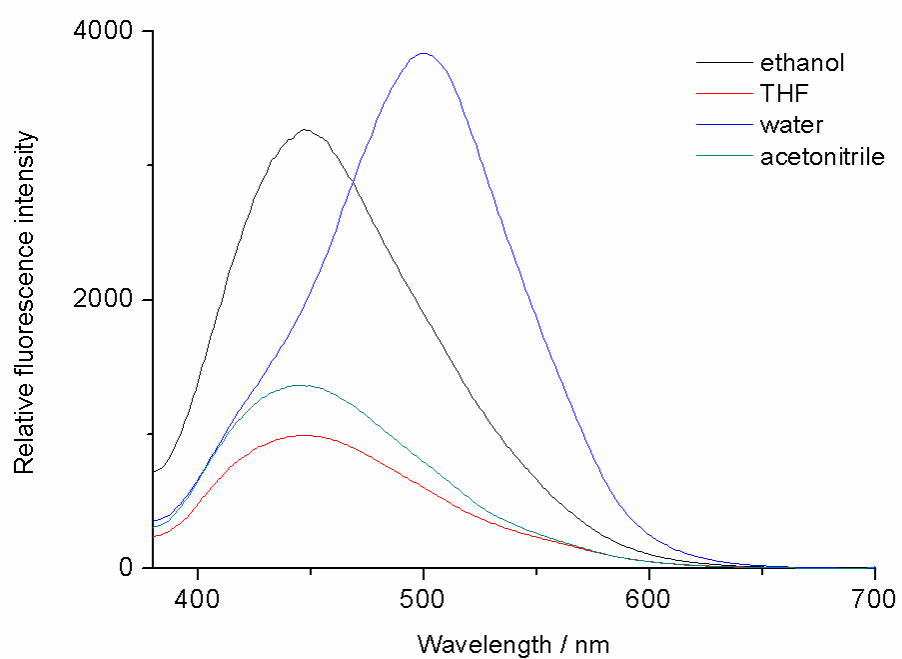

Fig. S16 Fluorescence emission spectra ( $\lambda_{\text{ex}}=360$  nm) of CDs (CD-COOH) in ethanol, THF, water, acetonitrile.

**Table S1** Elemental analysis results of CDs and CDs-imidazole.

| samples       | N%    | C%    | H%   | O%    |
|---------------|-------|-------|------|-------|
| CDs           | 20.79 | 37.32 | 4.70 | 37.19 |
|               | 20.99 | 37.23 | 4.81 | 36.97 |
| CDs-imidazole | 18.26 | 40.19 | 4.10 | 37.46 |
|               | 18.27 | 40.05 | 4.07 | 37.61 |

**Table S2** Photophysical Properties of CDs and CDs-imidazole. Decay times  $\tau_1$ ,  $\tau_2$  and  $\tau_3$ , and the relative amplitude (%).

| Samples       | solution                        | Emission Wavelength /nm | $\tau_1$ /ns | $\tau_2$ /ns | $\tau_3$ /ns  |
|---------------|---------------------------------|-------------------------|--------------|--------------|---------------|
| CDs           | H <sub>2</sub> O                | 440                     | 1.18(3.13%)  | 5.46(29.64%) | 12.11(67.23%) |
|               |                                 | 460                     | 1.23(3.07%)  | 6.01(35.16%) | 12.66(61.77%) |
|               |                                 | 480                     | 1.77(4.63%)  | 6.26(45.82%) | 13.31(49.55%) |
|               | EtOH                            | 440                     | 1.22(3.40%)  | 6.52(44.56%) | 12.06(52.04%) |
|               |                                 | 460                     | 1.18(2.49%)  | 7.02(44.20%) | 12.69(53.31%) |
|               |                                 | 480                     | 1.32(1.75%)  | 7.91(39.13%) | 13.20(59.12%) |
| CDs-imidazole | EtOH+H <sub>2</sub> O (V/V,1:1) | 440                     | 1.16(8.52%)  | 5.06(28.81%) | 12.11(62.67%) |
|               |                                 | 460                     | 1.03(5.73%)  | 5.09(25.77%) | 12.01(68.49%) |
|               |                                 | 480                     | 1.09(3.53%)  | 5.00(20.73%) | 11.78(75.74%) |
|               | MeCN+H <sub>2</sub> O (V/V,1:1) | 440                     | 0.88(4.41%)  | 5.17(26.62%) | 12.02(68.97%) |
|               |                                 | 460                     | 1.05(3.91%)  | 5.51(25.22%) | 12.33(70.87%) |
|               |                                 | 480                     | 1.05(4.43%)  | 6.12(24.55%) | 12.93(71.03%) |
|               | THF+H <sub>2</sub> O (V/V,1:1)  | 440                     | 1.06(7.50%)  | 6.03(34.60%) | 12.50(57.90%) |
|               |                                 | 460                     | 0.99(6.80%)  | 5.69(26.82%) | 12.38(66.38%) |
|               |                                 | 480                     | 1.04(4.45%)  | 6.18(25.26%) | 13.00(70.29%) |
| CDs-imidazole | EtOH+0.9 M <i>p</i> TsOH        | 440                     | 0.74(35.31%) | 3.59(43.18%) | 14.08(21.51%) |
|               |                                 | 460                     | 0.83(32.01%) | 3.76(45.29%) | 14.90(22.70%) |
|               |                                 | 480                     | 0.99(29.65%) | 3.72(46.13%) | 14.53(24.21%) |

## Reference

1 S. N. Baker and G. A. Baker, *Angew. Chem., Int. Ed.*, 2010, **49**, 6726-6744.

2 D. Wang, Y. Guo, W. Liu and W. Qin, *RSC Adv.*, 2014, **4**, 7435-7439.
